# Supplementary material for: MiR-199a-5P promotes osteogenic differentiation of human stem cells from apical papilla via targeting IFIT2 in apical periodontitis
Source: PubMed Central journal article supplement (PMC10098181; doi:10.3389/fimmu.2023.1149339), 2023-03-30
Supplement: DataSheet_1.pdf [file DataSheet_1.pdf]

## Supplementary Material

### 1 Supplementary Figures

#### 1.1 Figure S1

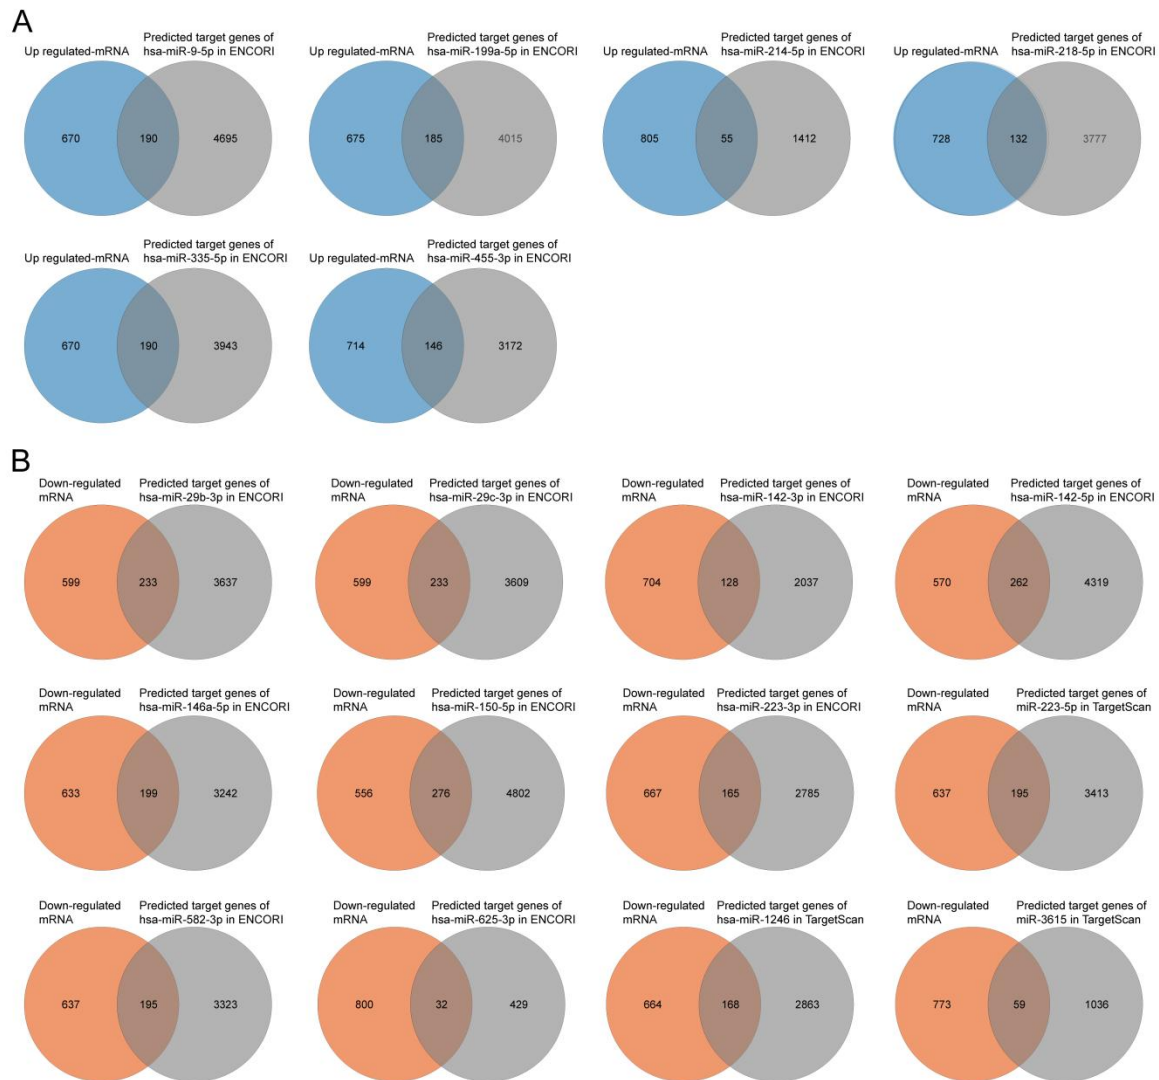

**Figure S1. Intersection genes of the DE-mRNAs and the predicted target genes of DE-miRNAs. (A) The up-regulated mRNAs intersected with the predicted target genes of 6 down-regulated miRNAs. (B) The down-regulated mRNAs intersected with the predicted target genes of 12 up-regulated miRNAs.**

## 1.2 Figure S2

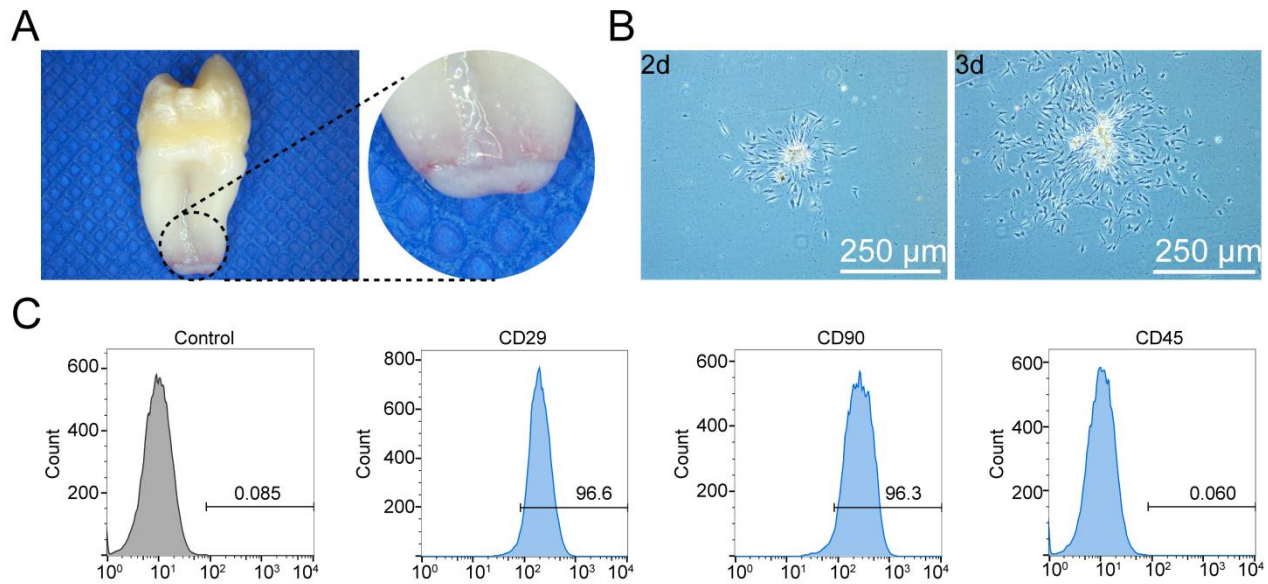

**Figure S2. Isolation and identification of hSCAPs.** (A) The apical papilla of immature young permanent teeth (dotted circles). (B) Primary hSCAPs on days 2 and 3. (C) Flow cytometric analysis of hSCAPs. Percentage values showed their positive expression patterns.

## 1.3 Figure S3

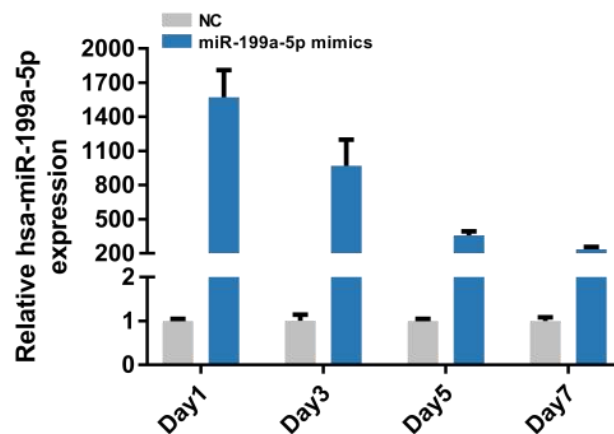

**Figure S3.** The relative expression level of miR-199a-5p after transfection of miR-199a-5p mimics into hSCAPs in vitro for several days.

## 1.4 Figure S4

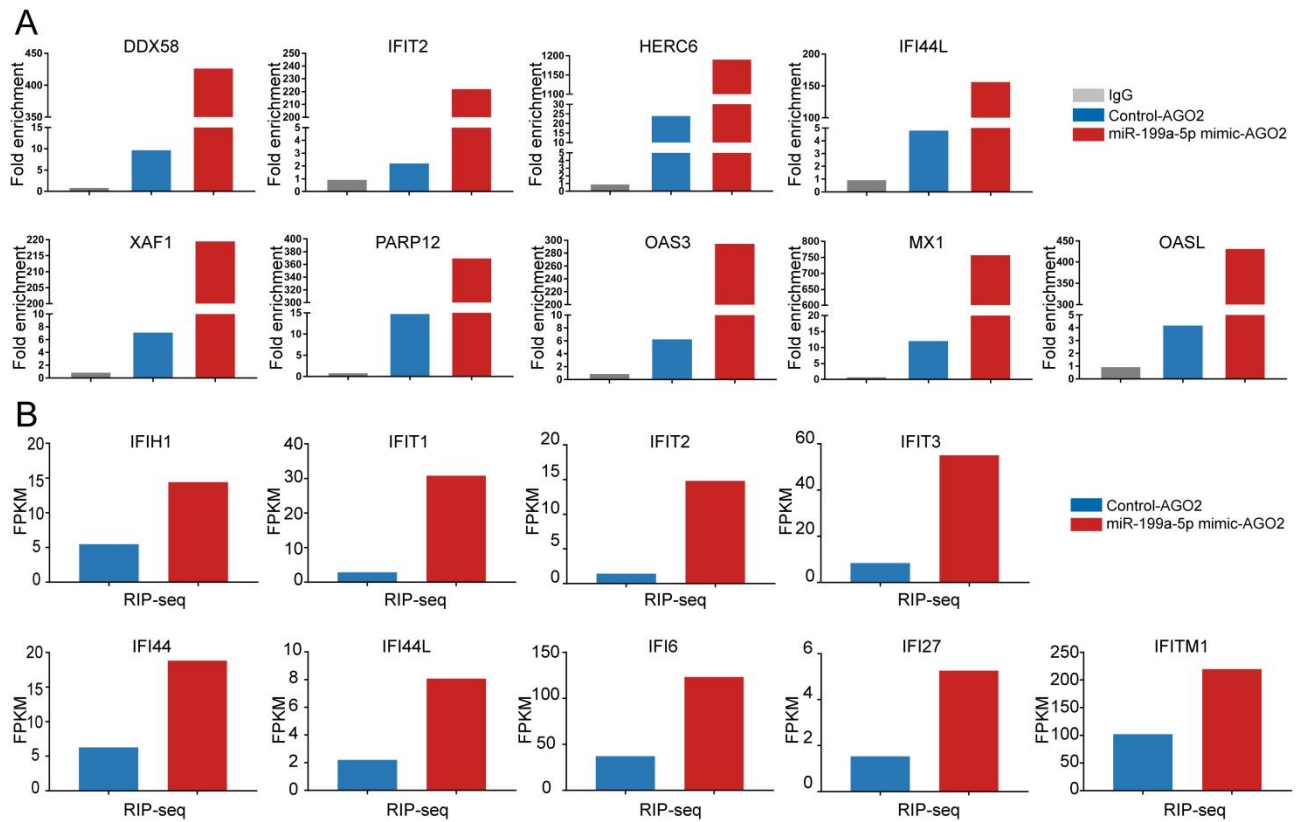

**Figure S4. The relative expression level of 9 potential target genes and ISG family genes in RIP products. (A)** The relative expression level of 9 potential target genes in anti-AGO2 immunoprecipitates between the miR-199a-5p overexpression group and the control group by qPCR. **(B)** ISG family genes including IFIT1, IFIT2, IFIT3, and IFI44L enriched in anti-AGO2 immunoprecipitates.

## 1.5 Figure S5

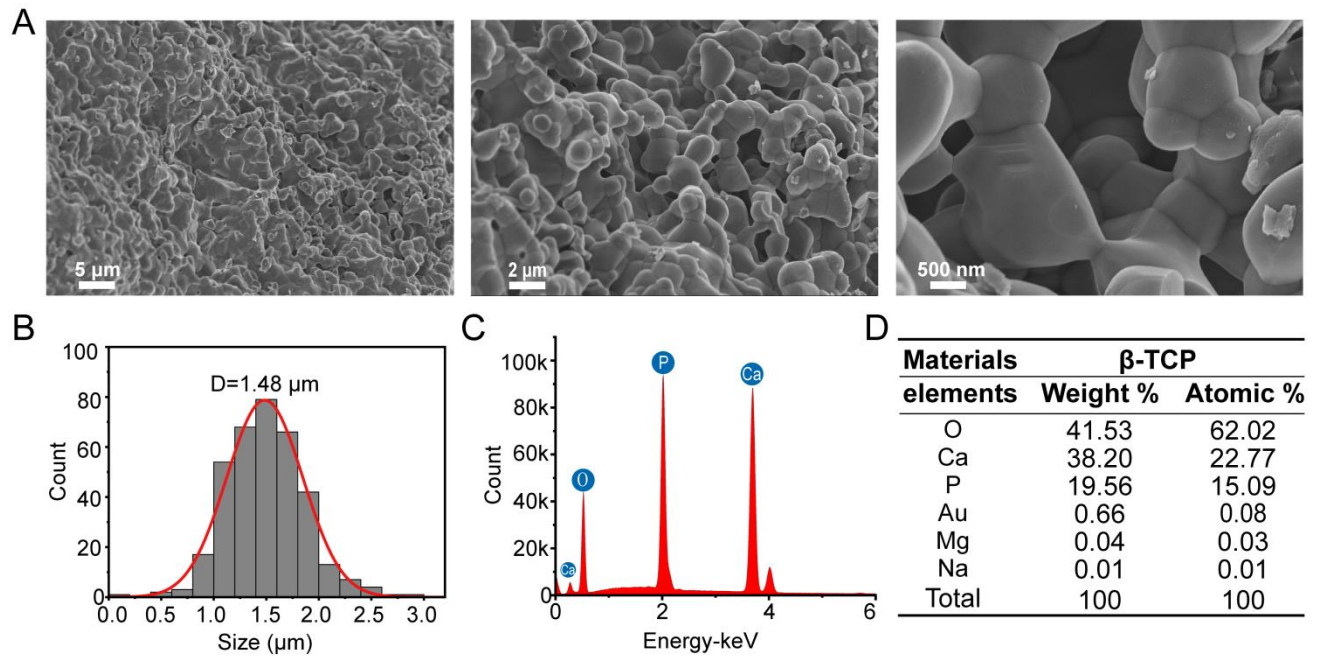

**Figure S5. The physical and chemical properties of  $\beta$ -TCP ceramic particles. (A)** The SEM images of  $\beta$ -TCP ceramic particles. **(B)** Analysis of particle size distribution. **(C, D)** EDS analysis of the scaffolds.

## 1.6 Figure S6

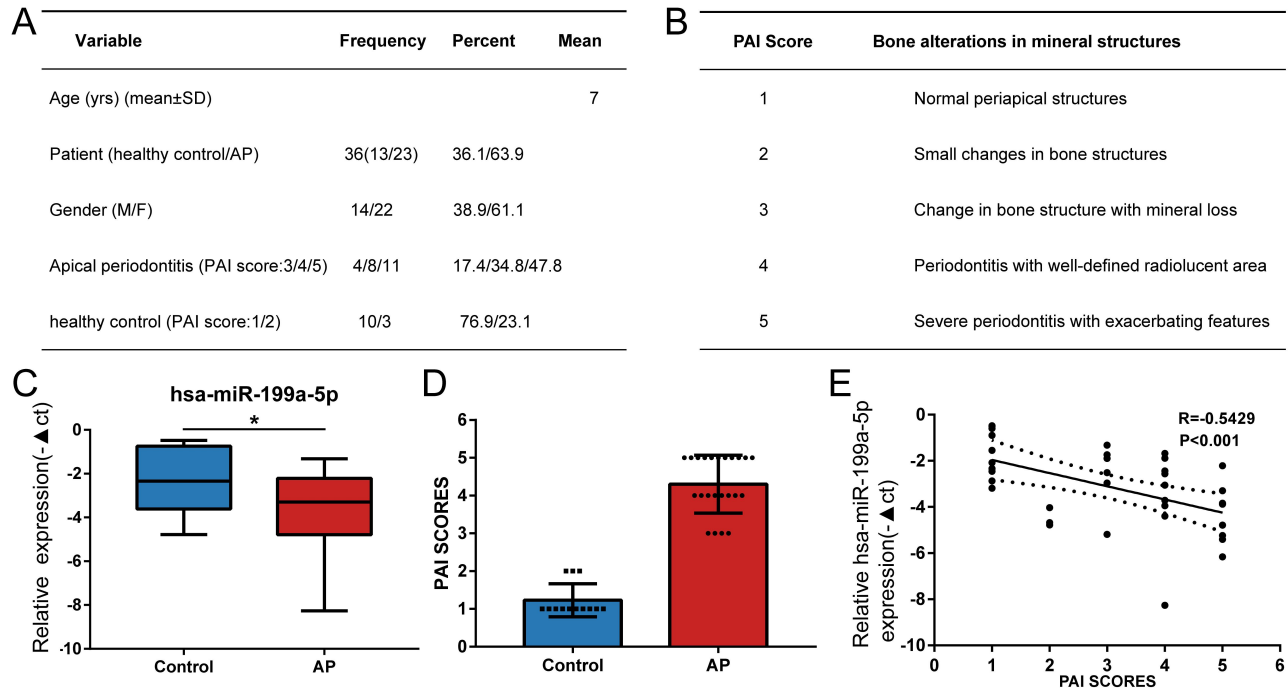

**Figure S6.** (A) The characteristics of the patients. (B) periapical index (PAI) scoring system (Venskutonis, 2016). (C) The relative expression of miR-199a-5p in the healthy control and AP groups. (D) The PAI scores in the healthy control and AP samples groups. (E) Spearman correlation analyses between the PAI scores and miR-199a-5p expression in periapical tissue samples (n = 36). Data were presented as the mean  $\pm$  SD. \* $p < 0.05$ .

## 2. Supplementary Tables

### 2.1 Table S1. Inclusion and exclusion criteria

|         | inclusions criteria                                                                                                                                                                                                                                                                                                                                                                                                                                                                                      | exclusions criteria                                                                                                                                                                                                                                                                                                        |
|---------|----------------------------------------------------------------------------------------------------------------------------------------------------------------------------------------------------------------------------------------------------------------------------------------------------------------------------------------------------------------------------------------------------------------------------------------------------------------------------------------------------------|----------------------------------------------------------------------------------------------------------------------------------------------------------------------------------------------------------------------------------------------------------------------------------------------------------------------------|
| Control | <ol style="list-style-type: none"> <li>1. Children aged 6-8 years whose permanent anterior teeth have erupted and the corresponding deciduous teeth have not yet fallen out (i.e., Retained deciduous teeth)</li> <li>2. Retained anterior deciduous teeth without caries</li> <li>3. The remaining root length of the retained anterior deciduous teeth is greater than 2/3.</li> </ol>                                                                                                                 | <ol style="list-style-type: none"> <li>1. Children older than 8 years old or younger than 6 years old.</li> <li>2. Children with systemic diseases: e.g. heart disease, asthma, diabetes, etc.</li> <li>3. Retained anterior teeth with caries.</li> <li>4. Root resorption of anterior teeth greater than 1/3.</li> </ol> |
| AP      | <ol style="list-style-type: none"> <li>1. Children aged 6-8 years whose deciduous molar teeth have not yet undergone physiological roots resorption.</li> <li>2. Indications for extraction of deciduous molars with severe periapical periodontitis:               <ol style="list-style-type: none"> <li>a) teeth with inflammatory root resorption and ineffective root canal treatment;</li> <li>b) Periapical inflammation spreading to the underlying permanent tooth germ.</li> </ol> </li> </ol> | <ol style="list-style-type: none"> <li>1. Children older than 8 years old or younger than 6 years old.</li> <li>2. Children with systemic diseases: e.g. heart disease, asthma, diabetes, etc.</li> <li>3. Teeth with apical periodontitis of non-carious origins.</li> </ol>                                              |

**2.2 Table S2. sequences of hsa-miR-199a-5p mimics and antagomir**

| Gene                      | sequence(5'-3')         |
|---------------------------|-------------------------|
| hsa-miR-199a-5p-mimics-ss | CCCAGUGUUCAGACUACCUGUUC |
| hsa-miR-199a-5p-mimics-as | ACAGGUAGUCUGAACACUGGGUU |
| hsa-miR-199a-5p-antagomir | ACAGGUAGUCUGAACACUGGGUU |

**2.3 Table S3. List of the primers used in the study**

| Gene          | Sequence                                                           | Use     |
|---------------|--------------------------------------------------------------------|---------|
| <i>GAPDH</i>  | Forward GTCTCCTCTGACTTCAACAGCG<br>Reverse ACCACCCTGTTGCTGTAGCCAA   | qRT-PCR |
| <i>RUNX2</i>  | Forward CCCAGTATGAGAGTAGGTGTCC<br>Reverse GGGTAAGACTGGTCATAGGACC   |         |
| <i>OSX</i>    | Forward TTCTGCGGCAAGAGGTTCACTC<br>Reverse GTGTTTGCTCAGGTGGTCGCTT   |         |
| <i>ALP</i>    | Forward GCTGTAAGGACATCGCCTACCA<br>Reverse CCTGGCTTTCTCGTCACTCTCA   |         |
| <i>OCN</i>    | Forward CGCTACCTGTATCAATGGCTGG<br>Reverse CTCCTGAAAGCCGATGTGGTCA   |         |
| <i>OPN</i>    | Forward CGAGGTGATAGTGTGGTTTATGG<br>Reverse GCACCATTCAACTCCTCGCTTTC |         |
| <i>IFIT2</i>  | Forward GGAGCAGATTCTGAGGCTTTGC<br>Reverse GGATGAGGCTTCCAGACTCCAA   |         |
| <i>MX1</i>    | Forward GGCTGTTTACCAGACTCCGACA<br>Reverse CACAAAGCCTGGCAGCTCTCTA   |         |
| <i>OASL</i>   | Forward GAGTGAAGGAAGAGGTGCTAGA<br>Reverse TCCATATCAGCCTCAGAACATCTT |         |
| <i>IFI44L</i> | Forward TGCACTGAGGCAGATGCTGCG<br>Reverse TCATTGCGGCACACCAGTACAG    |         |
| <i>DDX58</i>  | Forward CACCTCAGTTGCTGATGAAGGC<br>Reverse GTCAGAAGGAAGCACTTGCTACC  |         |
| <i>HERC6</i>  | Forward GGAGAAACGACTTCCATTGATGTG<br>Reverse AGCTCTGAGCAGATCATCCTCG |         |
| <i>XAF1</i>   | Forward CCTCCATGAGGCTTACTGCCTG<br>Reverse GAAACTCCAGCGAGGACTTCTG   |         |
| <i>OAS3</i>   | Forward CCTGATTCTGCTGGTGAAGCAC<br>Reverse TCCCAGGCAAAGATGGTGAGGA   |         |
| <i>PARP12</i> | Forward CTCTGTCACCAAACCTCCACAC<br>Reverse GCTACTGCTGACAGTGGTCACA   |         |



#### 2.4 Table S4. List of the primers used in the study

| Gene                   | Sequence                                                            | Use                    |
|------------------------|---------------------------------------------------------------------|------------------------|
| <i>hsa-miR-199a-5p</i> | Forward GCCCAGTGTTTCAGACTACCTGTT                                    | qRT-PCR<br>(tailed)    |
| <i>hsa-miR-335-5p</i>  | Forward GGTC AAGAGCAATAACGAAAAATG                                   |                        |
| <i>hsa-miR-9-5p</i>    | Forward CGAGTCTTTGGTTATCTAGCTGTATG                                  |                        |
| <i>hsa-miR-218-5p</i>  | Forward CGAGTTGTGCTTGATCTAACCAT                                     |                        |
| <i>hsa-miR-455-3p</i>  | Forward GGCAGTCCATGGGCATATACA                                       |                        |
| <i>hsa-miR-29b-3p</i>  | Forward GAGTAGCACCATTTGAAATCAGTGT                                   |                        |
| <i>hsa-miR-223-3p</i>  | Forward GAGTGTCAGTTTGTCAAATACCCC                                    |                        |
| <i>U6</i>              | Forward CTCGCTTCGGCAGCACA<br>Reverse AACGCTTCACGAATTTGCGT           |                        |
| <i>hsa-miR-199a-5p</i> | Forward GCGCCAGTGTTTCAGACTAC<br>Common-Reverse ACTGCAGGGTCCGAGGTATT | qRT-PCR<br>(Stem-loop) |
| <i>hsa-miR-199a-5p</i> | GTCGTATCGACTGCAGGGTCCGAGGTATTTCGCAGTCG<br>ATACGACGAACAG             | RT<br>(Stem-loop)      |
| <i>siFIT2-1</i>        | Forward CCUGGAAUGCUUACGUAAA<br>Reverse UUUACGUAAGCAUUC CAGG         | siRNA<br>silencing     |
| <i>siFIT2-2</i>        | Forward GCCAGACAAAGCGAUUGAA<br>Reverse UUCAUUCGUUUGUCUGGC           |                        |
| <i>siFIT2-3</i>        | Forward CUCAGACGUUCAGAUUUUAU<br>Reverse AUAAAUCUGAACGUCUGAG         |                        |

Reference

VENSKUTONIS, T. 2016. Periapical tissue evaluation: analysis of existing indexes and application of Periapical and Endodontic Status Scale (PESS) in clinical practice. *Giornale Italiano di Endodonzia*, 30, 14-21.
